# Supplementary material
Source: publisher figshare collection journal article supplement (https://sage.figshare.com/ndownloader/files/23681555)
Supplement: Supplementary file 1 [file 23681555]

**Supplementary Table S3:** Details of Clavien-Dindo ≥ Grade III complications across subgroups.

| **Subgroup** | **Grade** | **Details** |
| --- | --- | --- |
| 0-49 | None | N/A |
| 50-99 | IIIb | Incarcerated femoral hernia requiring small bowel resection and repair |
| IIIa | Haematuria requiring washout in theatre |
| IIIa | Infected lymphocele requiring percutaneous drain and ileus |
| 100-149 | IIIb | Incarcerated small bowel port site hernia small bowel resection and repair |
| IIIa | Suspected bleed from left bundle requiring embolization |
| 150-199 | None | N/A |
| ≥200 | IIIb | Small bowel instrument or port injury requiring small bowel resection and repair |
| IIIa | Pelvic haematoma requiring percutaneous drain |
